# Supplementary figures and images for: MxA as a clinically applicable biomarker for identifying systemic interferon type I in primary Sjögren's syndrome
Source: HighWire-hosted journal article supplement (doi:10.1136/annrheumdis-2012-202552), 2013-07-07

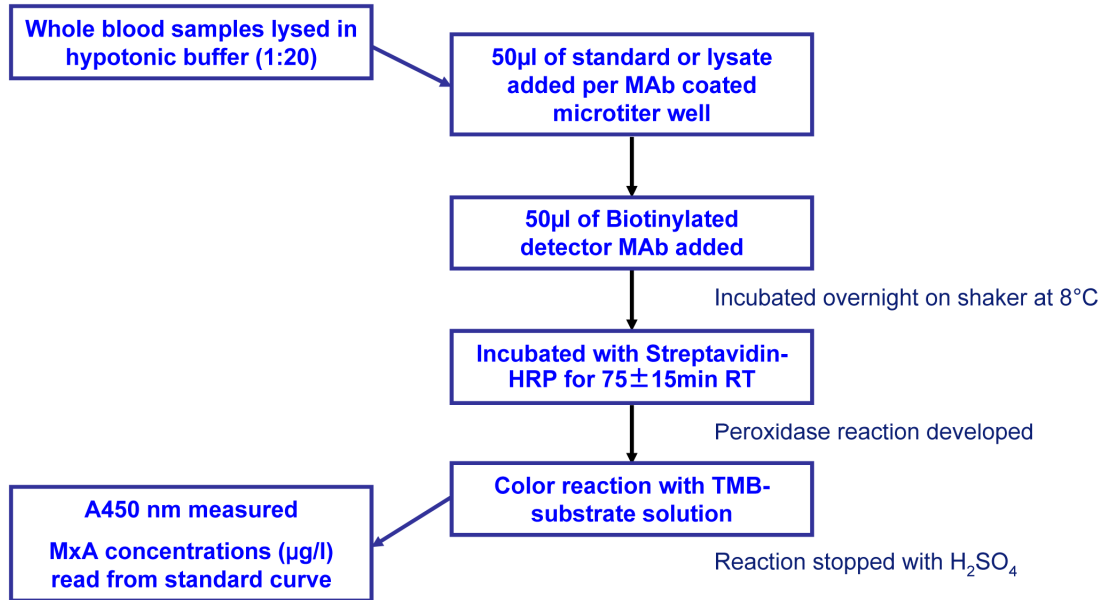

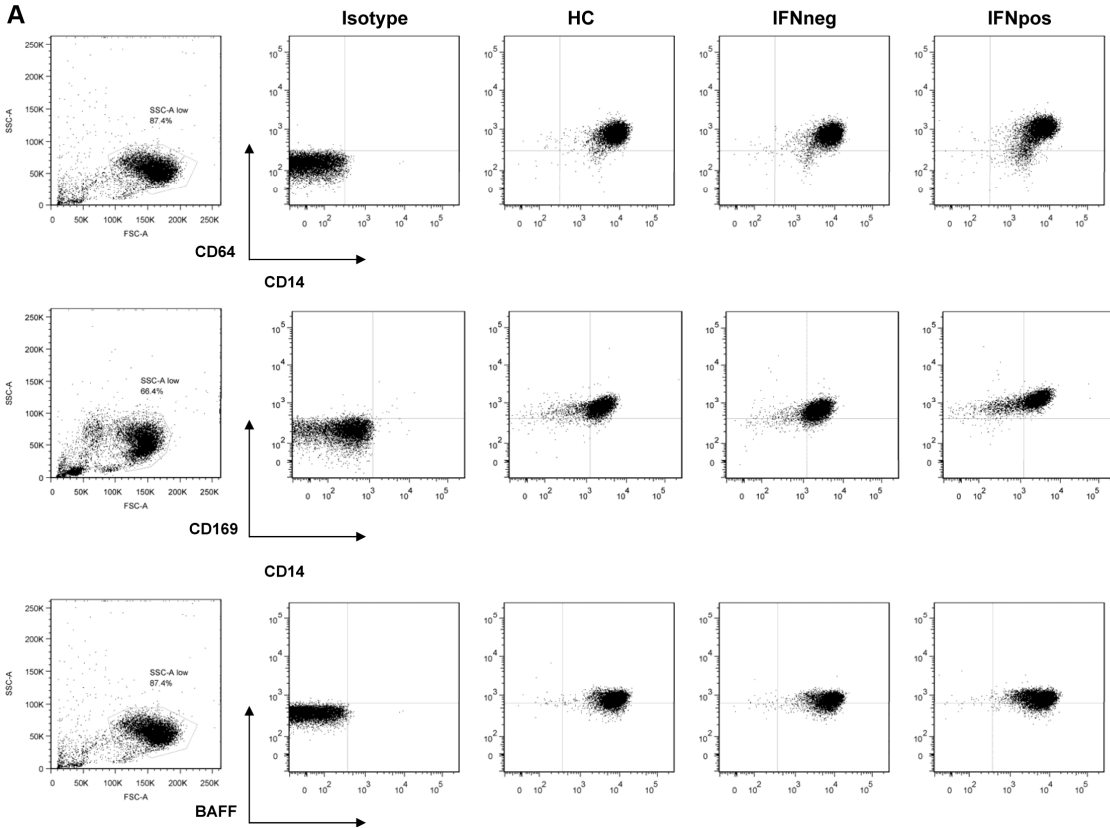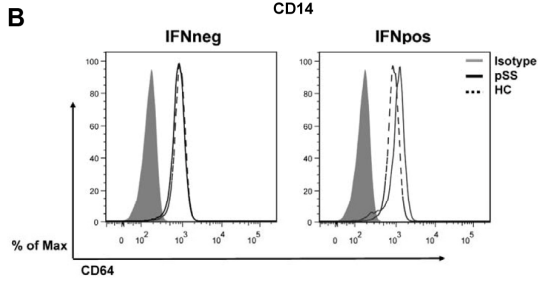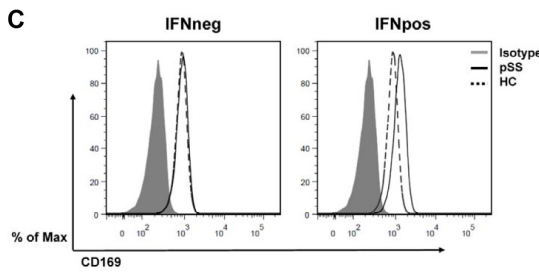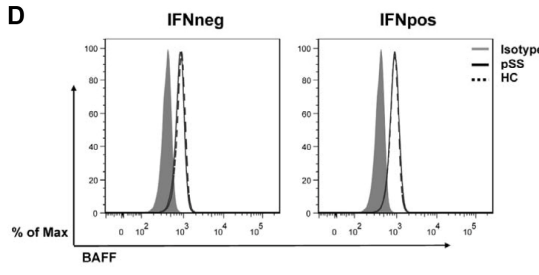

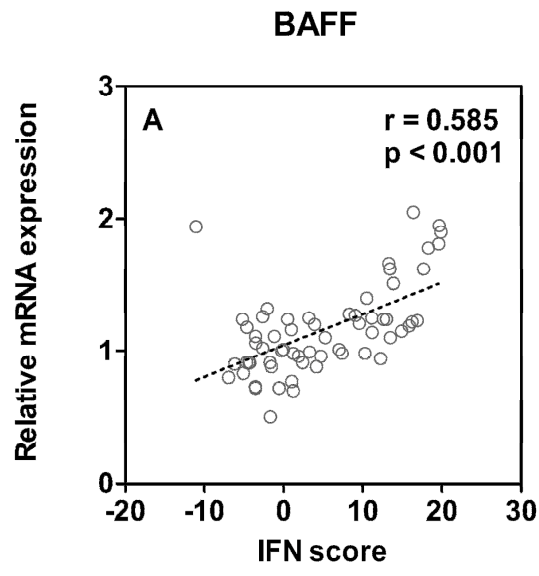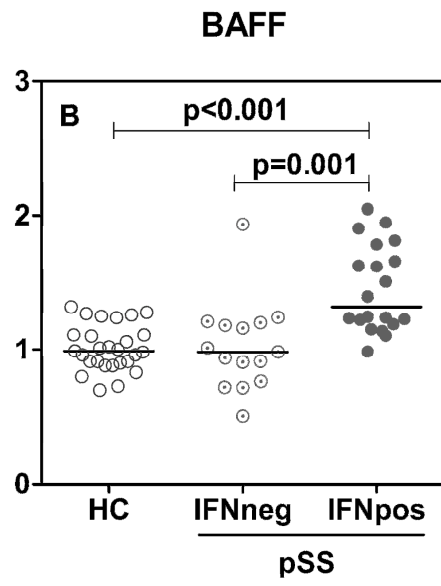

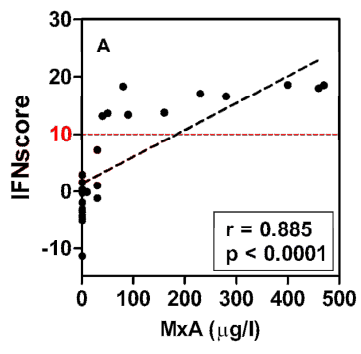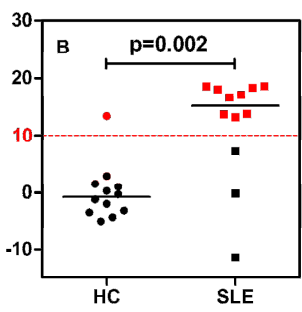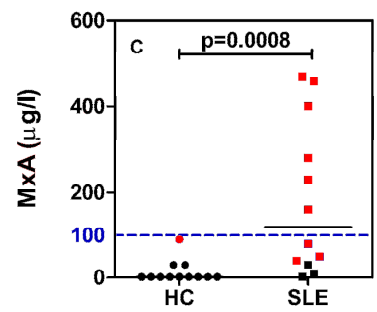

Supplement: annrheumdis-2012-202552supp_figures.pdf [file annrheumdis-2012-202552supp_figures.pdf]
